# Supplementary material for: Effects of functional correction training on movement patterns and physical fitness in male college students
Source: PeerJ. 2024 Feb 8;12:e16878. doi: 10.7717/peerj.16878 (PMC10859080; doi:10.7717/peerj.16878)
Supplement: Supplemental Information 1 [file peerj-12-16878-s001.xls]

## Sheet: FCT
number	BMI(pre)	BF (%)(pre)	Sit and Reach(pre)	Pull-up(pre)	30-m sprint(pre)	Standing long jump(pre)	BMI(post)	BF (%)(post)	Sit and Reach(post)	Pull-up(post)	30-m sprint(post)	Standing long jump(post)
1	19.951	8.3	4	9	4.21	2.45	20.2449	7	4.5	7	4.53	2.55
2	22.1403	11.8	12	8	4.29	2.64	22.4108	12.4	20.5	8	4.16	2.7
3	27.1731	15.7	3.5	3	4.13	2.45	27.7575	15.2	4.5	4	4.22	2.6
4	24.1906	16.8	16	5	4.33	2.71	24.0569	15.2	22.5	5	4.26	2.6
5	23.769	15	12.5	2	4.15	2.5	23.8287	16.1	12.5	5	4.11	2.65
6	24.6249	17.6	7.5	5	4.03	2.5	24.3242	15.1	11.5	6	4.41	2.5
7	20.0819	11	26.5	10	4.17	2.6	20.4452	10.9	25.5	12	4.09	2.74
8	18.8268	9.1	16.5	8	4.15	2.63	19.091	8.1	12.5	7	4.32	2.5
9	21.5005	13.6	11.5	5	4.13	2.71	21.5974	11.9	11.5	6	4.2	2.5
10	19.4321	12.2	12.5	3	4.12	2.5	19.5721	12.7	13.5	6	4.39	2.5
11	19.7531	13.6	20	3	4.3	2.65	20.0926	14.9	19.5	6	4.22	2.67
12	24.0186	19.2	13	2	4.19	2.75	23.8572	17.1	13.5	5	4.17	2.65
13	21.3294	10.9	9.8	9	4.21	2.76	20.9396	9.8	13.5	12	4.36	2.6
14	22.1605	11.3	32.5	7	4.35	2.54	22.3148	8.6	34.5	10	4.49	2.65
15	22.0761	13.8	23	3	5.5	2.35	22.0415	13	21.5	4	4.83	2.3

## Sheet: SS
number	BMI(pre)	BF (%)(pre)	Sit and Reach(pre)	Pull-up(pre)	30-m sprint(pre)	Standing long jump(pre)	BMI(post)	BF (%)(post)	Sit and Reach(post)	Pull-up(post)	30-m sprint(post)	Standing long jump(post)
1	21.4506	11.5	21	6	4.26	2.82	21.489	10	24	10	4.19	2.77
2	19.3686	8.4	15.5	15	4.44	2.66	19.6799	9.6	16.5	20	4.23	2.74
3	23.3729	15.2	14	8	4.17	2.86	22.3754	13.9	17.5	10	4.16	2.82
4	22.0967	12.8	23.5	8	4.03	2.93	22.52	13.5	23	10	4.05	2.86
5	22.1403	15.1	-9	4	4.5	2.51	21.0925	10	-5	4	4.42	2.67
6	23.2925	14.7	14	3	3.97	2.68	22.9453	16	20	5	4.2	2.67
7	22.9885	13.4	12	7	4.32	2.43	23.1867	14.2	15	10	4.4	2.63
8	20.315	9.5	9.5	10	4.17	2.7	20.484	12.4	9	15	4.5	2.65
9	24.6812	19.1	13	5	4.42	2.45	24.4919	19.5	5	6	4.42	2.57
10	18.9769	6.7	26	14	4.63	2.83	19.4118	7.4	25	15	4.38	2.78
11	20.1411	5.9	13.5	16	4.12	2.85	19.7247	3.3	11	12	4.23	2.86
12	23.7659	10.6	18	11	4.28	2.68	23.261	10.6	17.5	14	4.58	2.5
13	23.1529	13.8	26	11	4.19	2.87	22.733	12.5	27	10	4.54	2.85

## Sheet: FMS(FCT)
number	Deep Squat (pre)	Hurdle Step (pre)	In-Line Lunge (pre)	Shoulder Mobility (pre)	Active Straight Leg Raise (pre)	Trunk Stability Push up (pre)	Rotary Stability (pre)	Total score (pre)	Deep Squat (post)	Hurdle Step (post)	In-Line Lunge (post)	Shoulder Mobility (post)	Active Straight Leg Raise (post)	Trunk Stability Push up (post)	Rotary Stability (post)	Total score (post)
1	3	2	3	2	2	3	1	16	3	2	3	2	3	3	2	18
2	2	2	3	2	2	2	2	15	2	3	3	2	2	3	1	16
3	2	2	2	3	2	1	1	13	2	2	3	3	2	2	2	16
4	2	3	3	3	2	3	1	17	2	3	3	3	3	3	2	19
5	3	2	3	3	3	2	1	17	3	3	3	3	3	3	2	20
6	2	2	3	2	2	2	1	14	2	2	3	2	1	3	2	15
7	2	3	3	2	3	3	1	17	3	3	3	3	3	3	2	20
8	2	2	3	3	3	3	1	17	2	3	3	3	3	3	2	19
9	2	2	2	3	3	3	1	16	2	2	3	3	3	3	1	17
10	2	3	3	3	3	3	2	19	2	3	3	3	3	3	2	19
11	1	2	3	3	3	1	1	14	3	2	3	3	3	3	2	19
12	2	2	2	3	2	3	1	15	2	3	3	3	3	3	2	19
13	2	2	2	2	1	3	2	14	3	2	3	2	2	2	1	15
14	3	2	3	2	2	3	1	16	3	3	3	3	3	3	1	19
15	2	2	3	3	2	3	1	16	3	3	3	3	3	3	2	20

## Sheet: FMS(SS)
number	Deep Squat (pre)	Hurdle Step (pre)	In-Line Lunge (pre)	Shoulder Mobility (pre)	Active Straight Leg Raise (pre)	Trunk Stability Push up (pre)	Rotary Stability (pre)	Total score (pre)	Deep Squat (post)	Hurdle Step (post)	In-Line Lunge (post)	Shoulder Mobility (post)	Active Straight Leg Raise (post)	Trunk Stability Push up (post)	Rotary Stability (post)	Total score (post)
1	3	2	3	2	3	2	2	17	3	2	3	2	3	1	1	15
2	2	2	3	2	2	3	1	15	2	2	3	2	2	3	2	16
3	2	2	3	3	3	3	1	17	2	2	3	2	3	3	1	16
4	0	1	2	2	3	2	1	11	0	2	3	2	3	3	1	14
5	3	2	3	3	3	2	2	18	3	2	3	3	2	3	2	18
6	3	2	3	3	3	3	1	18	3	1	3	3	3	3	1	17
7	3	3	3	2	2	3	1	17	3	3	3	2	2	3	1	17
8	2	2	3	2	3	3	1	16	2	2	3	2	3	3	1	16
9	2	2	2	3	3	3	2	17	2	2	3	3	2	3	2	17
10	3	3	3	2	3	3	1	18	3	3	3	3	3	3	2	20
11	3	3	2	2	3	2	2	17	3	3	3	2	3	2	2	18
12	2	2	3	3	3	3	2	18	2	2	3	3	3	3	1	17
13	3	3	3	0	3	3	2	17	3	3	3	2	3	3	2	19
